# Supplementary material for: Defects Act in an “Introverted” Manner in FeNiCrCoCu High-Entropy Alloy under Primary Damage
Source: MDPI journal article supplement (doi:10.3390/met14030264), 2024-02-22
Supplement: s1 [file s1]

Archive with 1 entries (1 files):
- metals-2842548-supplementary.pdf
